# Supplementary material for: ROS-scavenging glyco-nanoplatform for synergistic antibacterial and wound-healing therapy of bacterial keratitis
Source: Royal Society of Chemistry journal article supplement (doi:10.1039/d2tb00667g), 2022-01-01
Supplement: d2tb00667g1.pdf [file d2tb00667g1.pdf]

## Supporting Information

### ROS-Scavenging Glyco-Nanoplatfrom for Synergistic Antibacteria and Wound-

### Healing Therapy of Bacterial Keratitis

Yanlong Zhang<sup>a,b</sup>, Gang Li<sup>a,b</sup>, Xinge Zhang<sup>c</sup>, Ling Lin<sup>a,b,\*</sup>

<sup>a</sup>State Key Laboratory of Precision Measurement Technology and Instrument, School of Precision

Instruments & Opto-Electronics Engineering, Tianjin University, Tianjin 300072, China

<sup>b</sup>Tianjin Key Laboratory of Biomedical Detection Techniques & Instruments, Tianjin University,

Tianjin 300072, China

<sup>c</sup> Key Laboratory of Functional Polymer Materials of Ministry of Education, Institute of Polymer

Chemistry, College of Chemistry, Nankai University, Tianjin 300071, China

\* Corresponding author:

E-mail: linling@tju.edu.cn (L. Lin)

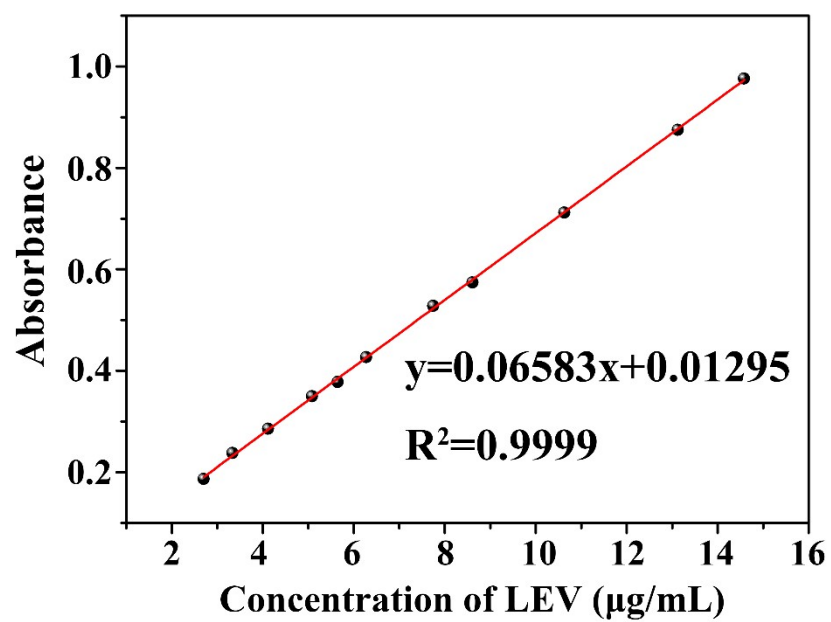

Fig. S1 The standard curve of LEV.

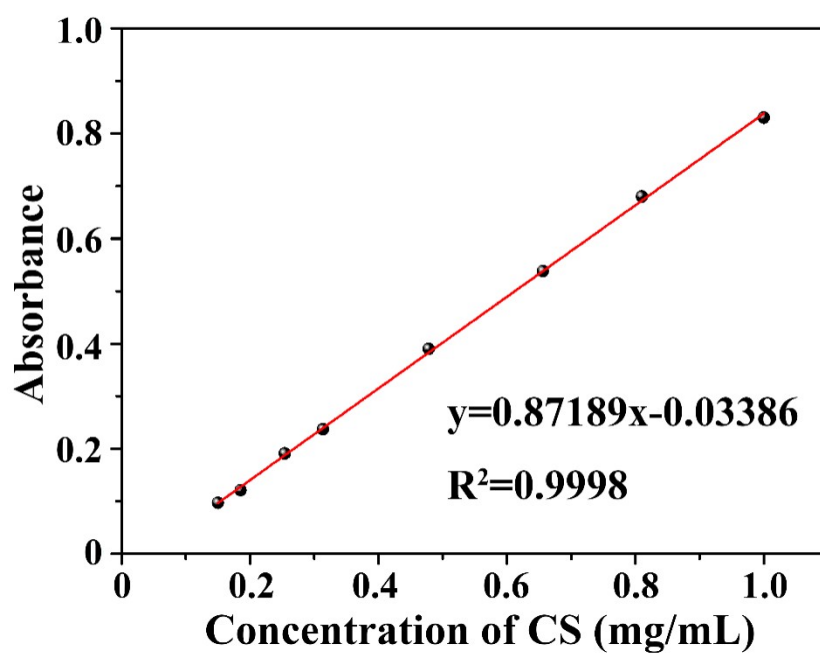

Fig. S2 The standard curve of CS.

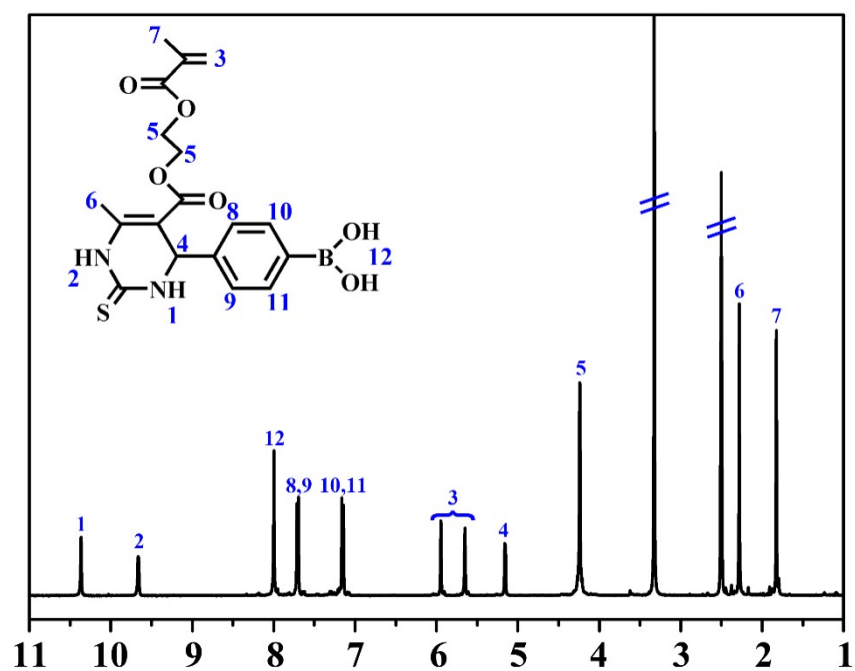

**Fig. S3**  $^1\text{H}$  NMR spectrum of PBA-DHPM in  $\text{DMSO}-d_6$ .

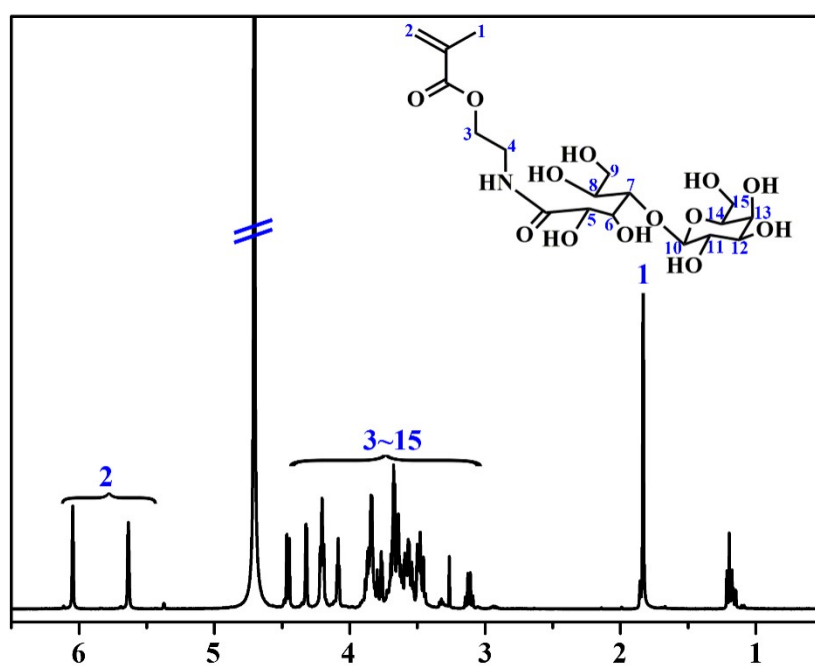

**Fig. S4**  $^1\text{H}$  NMR spectrum of LAMA in  $\text{D}_2\text{O}$ .

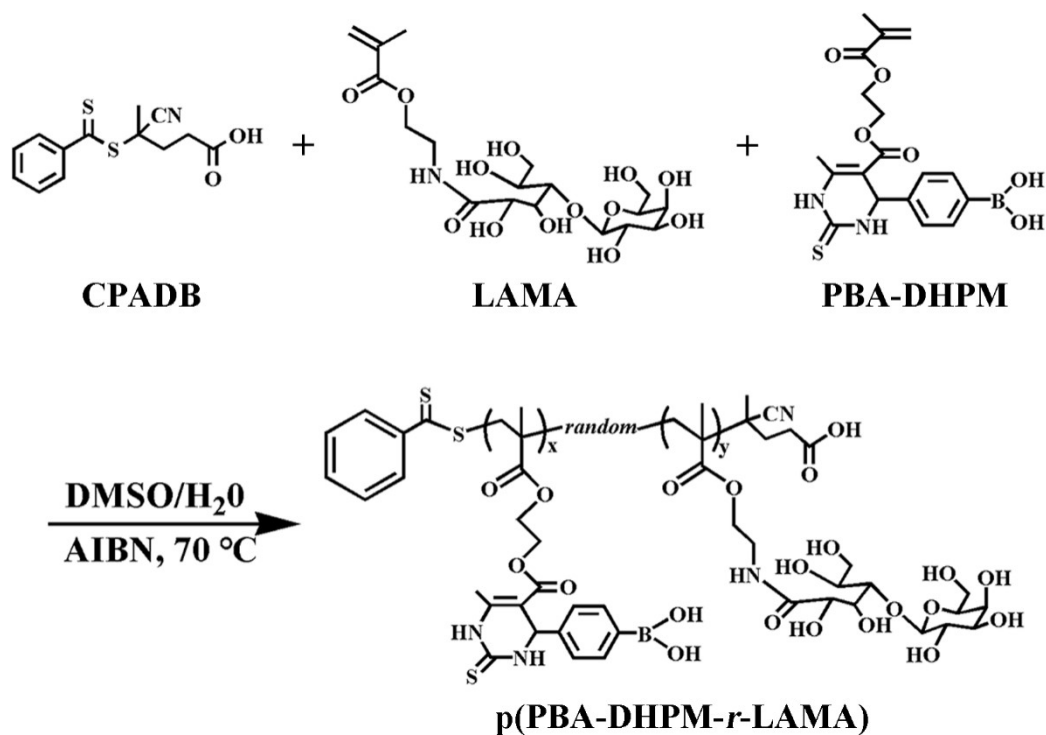

**Scheme S1.** Synthesis of glycopolymer p(PBA-DHPM-*r*-LAMA)

**Table S1.** Composition of amphiphilic glycopolymers.

| Sample                                                    | Monomer |          | RAFT agent | Conv (wt %) <sup>b</sup> | PBA-DHPM/LAMA       |                                 |
|-----------------------------------------------------------|---------|----------|------------|--------------------------|---------------------|---------------------------------|
|                                                           |         |          |            |                          | (mol/mol)           |                                 |
|                                                           |         |          |            |                          | Theory <sup>a</sup> | <sup>1</sup> H NMR <sup>b</sup> |
| p(PBA-DHPM <sub>40</sub> - <i>r</i> -LAMA <sub>20</sub> ) | LAMA    | PBA-DHPM | CPADB      | 85.43 ± 4.39             | 2                   | 2.23 ± 0.16                     |
| p(PBA-DHPM <sub>60</sub> - <i>r</i> -LAMA <sub>20</sub> ) | LAMA    | PBA-DHPM | CPADB      | 86.76 ± 5.02             | 3                   | 3.14 ± 0.19                     |
| p(PBA-DHPM <sub>80</sub> - <i>r</i> -LAMA <sub>20</sub> ) | LAMA    | PBA-DHPM | CPADB      | 84.74 ± 4.26             | 4                   | 3.95 ± 0.21                     |
| <i>p</i>                                                  |         |          |            | >0.05                    |                     | <0.05                           |

<sup>a</sup>The theoretical molar ratio of PBA-DHPM/LAMA; <sup>b</sup>The approximate polymerization conversion and glycopolymer compositions were measured on the basis of the integral intensity of the <sup>1</sup>H NMR spectra.

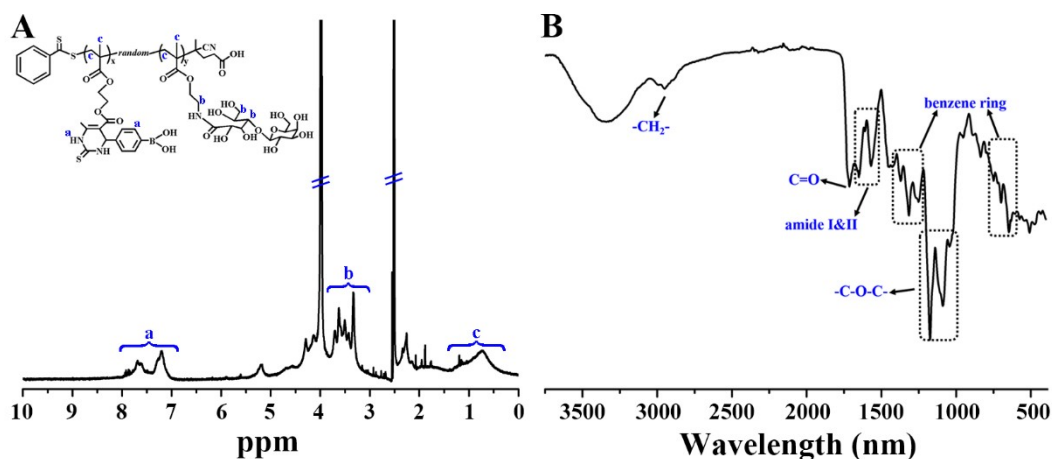

**Fig. S5** (A) <sup>1</sup>H NMR (DMSO-*d*<sub>6</sub>/D<sub>2</sub>O, v/v, 4:1) and (B) FT-IR spectrum of p(PBA-DHPM-*r*-LAMA).

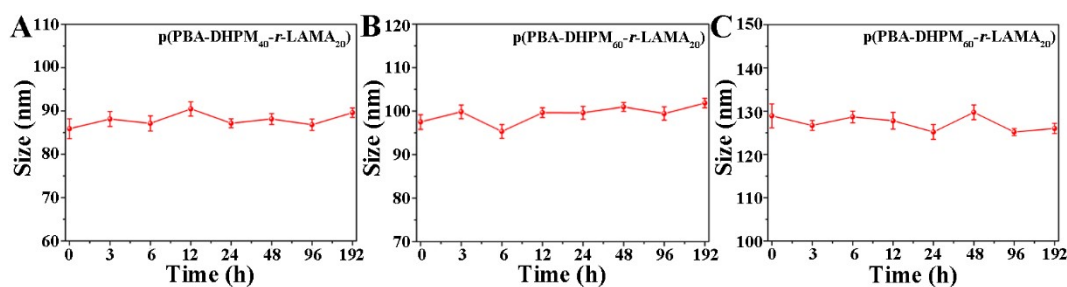

**Fig. S6** Colloidal stability of (A) NP1, (B) NP2 and (C) NP3.

**Table S2.**  $D_H$ , PDI, zeta potential and LC of the drug-loaded glycopolymeric nanoparticles <sup>a</sup>

| Sample     | $D_H$ (nm)    | PDI         | Zeta potential (mV) | LC (LEV, %)  | LC (CS, %)   |
|------------|---------------|-------------|---------------------|--------------|--------------|
| NP1@ (C+L) | 223.93 ± 6.20 | 0.25 ± 0.06 | -18.41 ± 1.95       | 11.38 ± 1.46 | 10.46 ± 0.85 |
| NP2@ (C+L) | 265.40 ± 5.45 | 0.22 ± 0.04 | -22.32 ± 2.44       | 12.01 ± 2.01 | 12.13 ± 0.59 |
| NP3@ (C+L) | 295.65 ± 8.58 | 0.26 ± 0.08 | -31.40 ± 7.07       | 11.85 ± 1.82 | 11.57 ± 1.61 |
| <i>p</i>   | < 0.05        | > 0.05      | < 0.05              | > 0.05       | > 0.05       |

<sup>a</sup> Each experiment was performed in triplicate and the results were reported as mean ± SD.

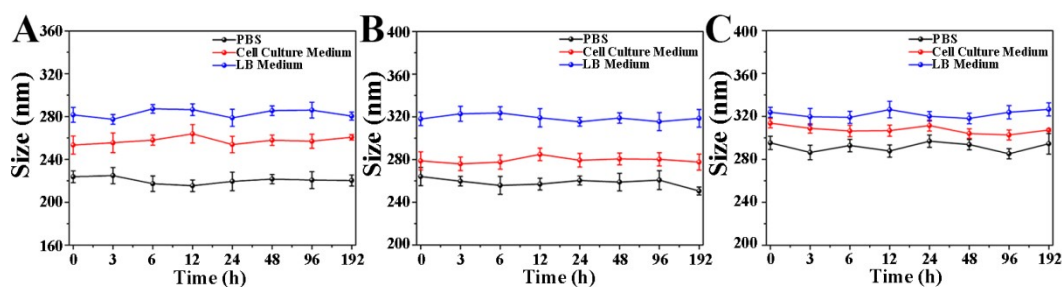

**Fig. S7** Colloidal stability of (A) NP1@C+L, (B) NP2@C+L and (C) NP3@C+L in PBS, cell culture medium and LB medium.

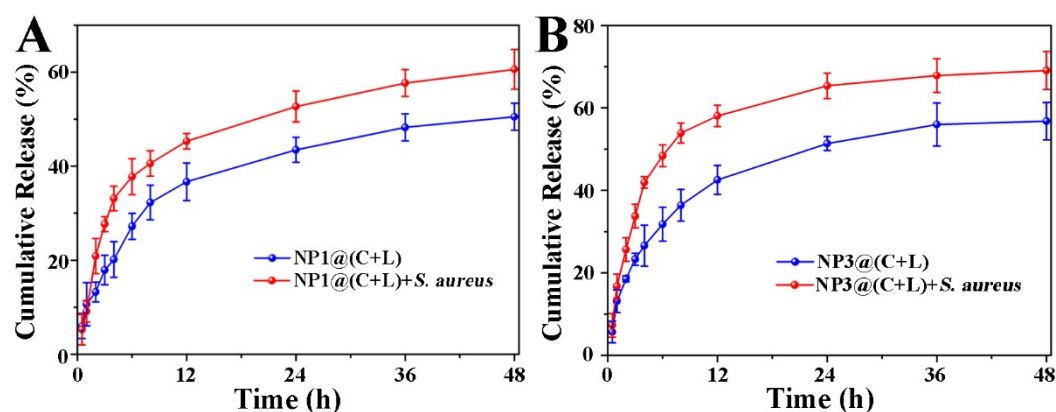

**Fig. S8** *In vitro* release profiles of LEV from (A) NP1@C+L and (B) NP3@C+L

nanoparticles in the absence and presence of *S. aureus* in PBS buffer (0.01 M, pH 7.4).

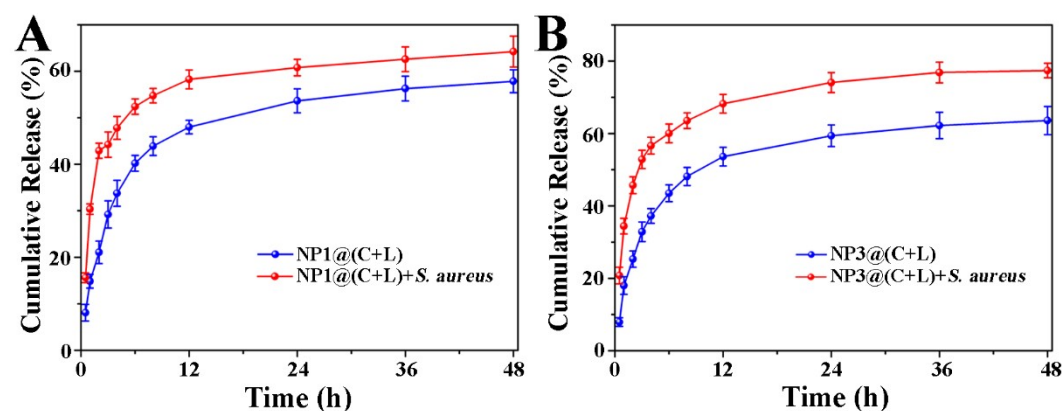

**Fig. S9** *In vitro* release profiles of CS from (A) NP1@C+L and (B) NP3@C+L

nanoparticles in the absence and presence of *S. aureus* in PBS buffer (0.01 M, pH 7.4).

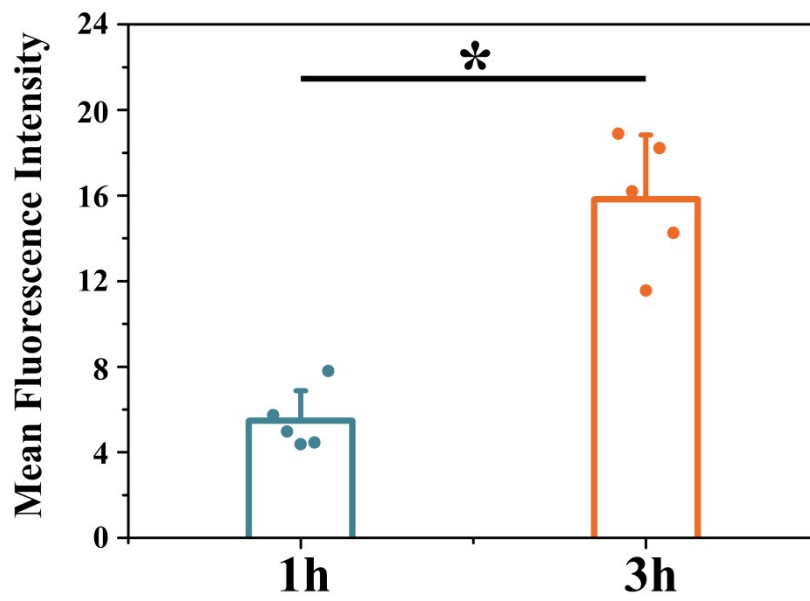

**Fig. S10** Mean fluorescent intensity of internalized nanoparticles by HECs

determined by ImageJ software after incubation for 1 h and 3 h.

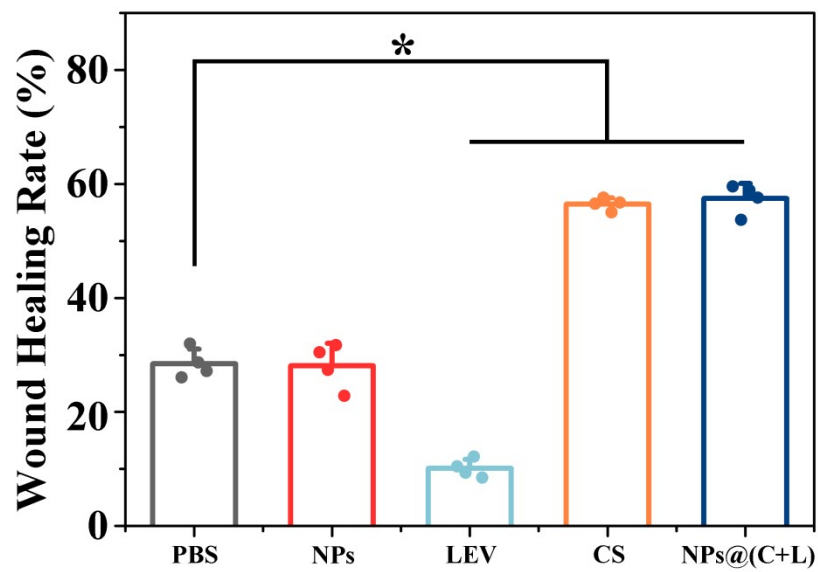

**Fig. S11** Statistical analysis of wound healing rate (%).

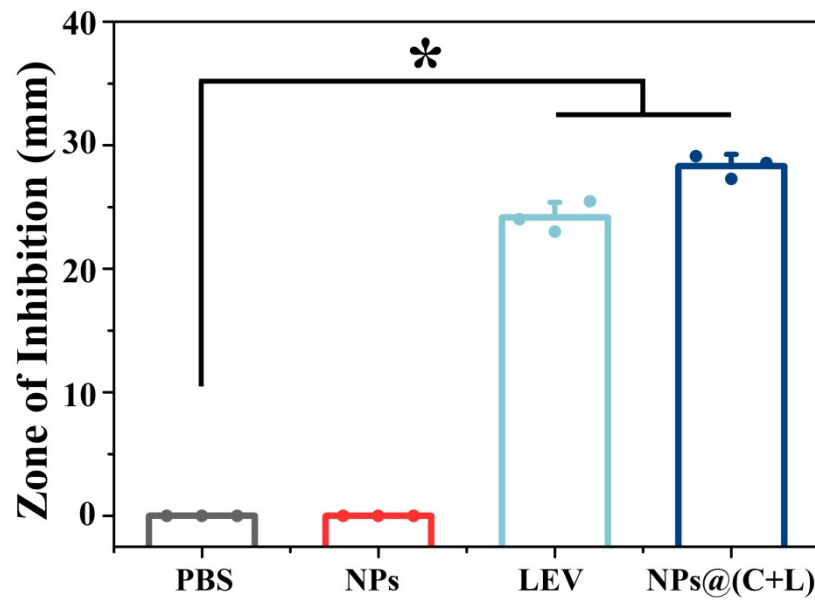

**Fig. S12** Inhibition zone assay of *S. aureus* treated with PBS, NPs, LEV and NPS@(C+L).

\* $p < 0.05$ .

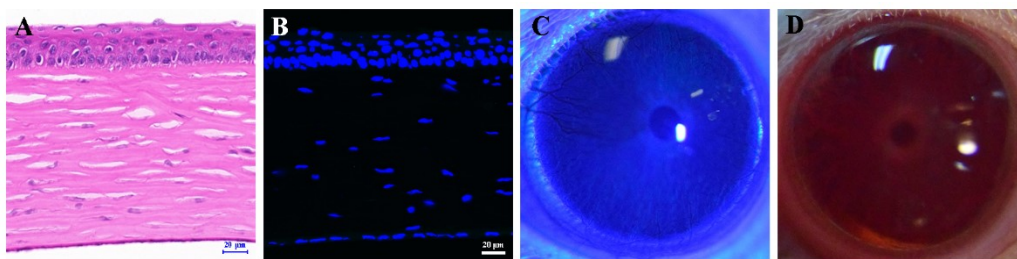

**Fig. S13** (A) H&E staining, (B) fluorescence-based TUNEL staining, (C) corneal fluorescein staining, and (D) slit lamp micrograph of the corneas treated with NPs.

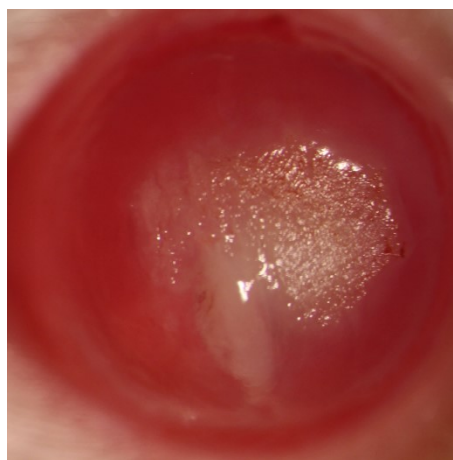

**Fig. S14** The micrograph of bacterial keratitis pictured with slit lamp microscope.

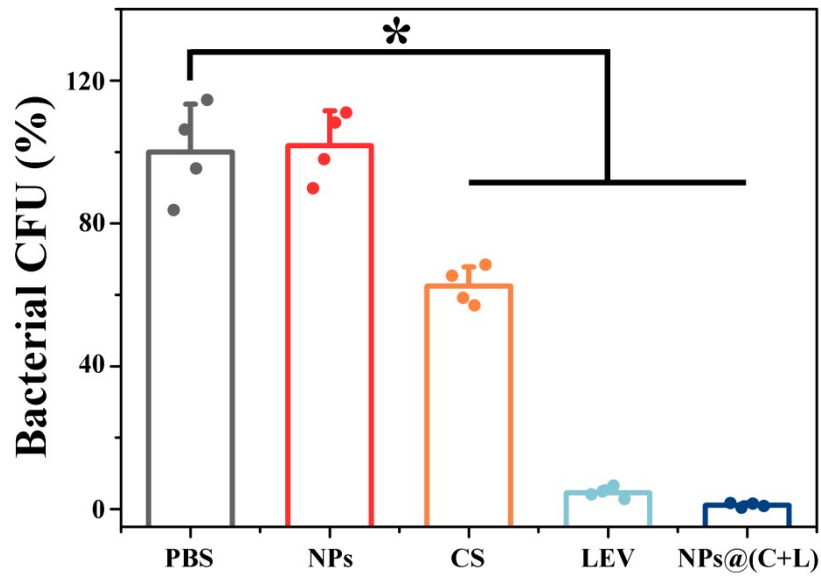

**Fig. S15** Statistical analysis of bacterial CFUs on LB agar plates after treatment with PBS, NPs, LEV, CS and NPs@(C+L).

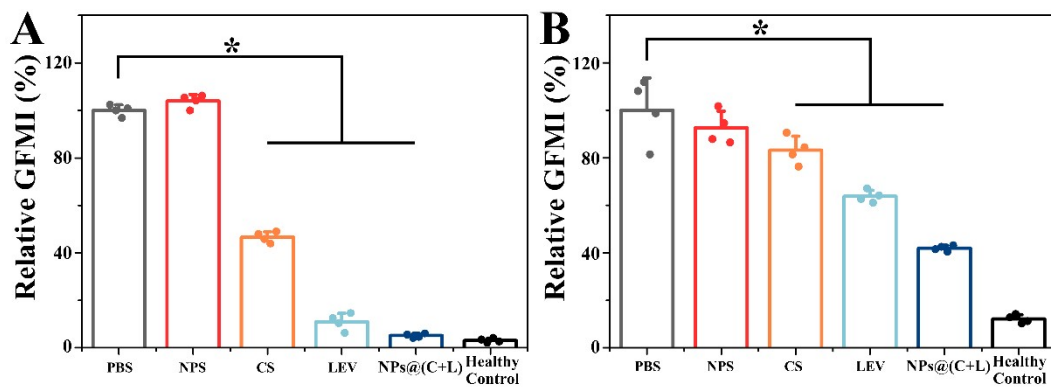

**Fig. S16** Geometric fluorescent mean intensity (GFMI) of (A) IL-1 $\beta$  and (B) TNF- $\alpha$  calculated with ImageJ software. \*p < 0.05.
